# Supplementary material for: Real-time measurement of radionuclide concentrations and its impact on inverse modeling of 106 Ru release in the fall of 2017
Source: Copernicus journal article supplement (doi:10.5194/amt-14-803-2021), 2021-02-02
Supplement: Supplementary file 1 [file amt-14-803-2021-supplement.pdf]

Supplement of Atmos. Meas. Tech., 14, 803–818, 2021  
<https://doi.org/10.5194/amt-14-803-2021-supplement>  
© Author(s) 2021. This work is distributed under  
the Creative Commons Attribution 4.0 License.

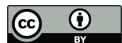

*Supplement of*

## **Real-time measurement of radionuclide concentrations and its impact on inverse modeling of $^{106}\text{Ru}$ release in the fall of 2017**

**Ondřej Tichý et al.**

*Correspondence to:* Ondřej Tichý (otichy@utia.cas.cz)

The copyright of individual parts of the supplement might differ from the CC BY 4.0 License.

## 1 General information

The list of Czech radiation monitoring stations involved in  $^{106}\text{Ru}$  measurement with specified latitude and longitude follows:

| Station          | latitude (decimal) | longitude (decimal) |
|------------------|--------------------|---------------------|
| Brno             | 49.2               | 16.6                |
| Ceske Budejovice | 48.967             | 14.467              |
| Holesov          | 49.317             | 17.567              |
| Hradec Kralove   | 50.233             | 15.87               |
| Cheb             | 50.083             | 12.4                |
| Kamenna          | 49.616             | 14.0                |
| Ostrava          | 49.833             | 18.283              |
| Plzen            | 49.733             | 13.366              |
| Praha            | 50.067             | 14.45               |
| Usti nad Labem   | 50.667             | 14.033              |

- 5 The four datasets used in the paper follows in separate sections. Each measurement is given with its start and end, measurement value and associated uncertainty. When relation *less than* (<) is used in measurement column, this means that the measurement is zero and the minimum detectable activity (MDAC) is given instead.

## 2 Dataset RAW

| Station          | Start            | End              | Measurement [mBq/m <sup>3</sup> ] | Uncertainty [%] |
|------------------|------------------|------------------|-----------------------------------|-----------------|
| Brno             | 26.09.2017 09:00 | 03.10.2017 09:00 | 21.1                              | 5.5             |
| Brno             | 03.10.2017 16:00 | 04.10.2017 14:30 | 0.84                              | 12              |
| Brno             | 04.10.2017 08:00 | 10.10.2017 08:00 | <0.005                            |                 |
| Ceske Budejovice | 26.09.2017 07:00 | 03.10.2017 07:00 | 1.9                               | 5.5             |
| Ceske Budejovice | 03.10.2017 07:10 | 03.10.2017 17:30 | <0.1                              |                 |
| Ceske Budejovice | 03.10.2017 17:30 | 04.10.2017 15:30 | <0.1                              |                 |
| Ceske Budejovice | 04.10.2017 15:30 | 10.10.2017 07:30 | <0.05                             |                 |
| Holesov          | 25.09.2017 07:20 | 02.10.2017 07:07 | 7.9                               | 10              |
| Holesov          | 02.10.2017 07:22 | 05.10.2017 08:28 | 21.2                              | 10              |
| Holesov          | 05.10.2017 08:29 | 09.10.2017 07:07 | 0.018                             | 40              |
| Hradec Kralove   | 26.09.2017 06:46 | 03.10.2017 06:47 | 10.9                              | 7               |
| Hradec Kralove   | 29.09.2017 08:25 | 03.10.2017 06:47 | 24.9                              | 6               |
| Hradec Kralove   | 03.10.2017 06:50 | 03.10.2017 13:50 | 4.19                              | 6               |
| Hradec Kralove   | 03.10.2017 13:54 | 04.10.2017 13:40 | <0.3                              |                 |
| Hradec Kralove   | 04.10.2017 13:40 | 05.10.2017 13:40 | <0.3                              |                 |
| Hradec Kralove   | 05.10.2017 13:40 | 10.10.2017 06:30 | <0.011                            |                 |
| Cheb             | 03.10.2017 11:50 | 04.10.2017 14:30 | <0.052                            |                 |
| Cheb             | 04.10.2017 14:30 | 10.10.2017 12:25 | <0.02                             |                 |
| Kamenna          | 25.09.2017 07:30 | 02.10.2017 07:30 | 3.74                              | 10              |
| Kamenna          | 02.10.2017 09:10 | 04.10.2017 14:12 | 1.31                              | 10              |
| Kamenna          | 04.10.2017 14:12 | 09.10.2017 09:10 | <0.02                             |                 |
| Ostrava          | 25.09.2017 06:00 | 02.10.2017 06:00 | 3.82                              | 8               |
| Ostrava          | 02.10.2017 06:00 | 03.10.2017 15:00 | 40                                | 10              |
| Ostrava          | 03.10.2017 15:00 | 04.10.2017 15:00 | 1.1                               | 10              |

| Station        | Start            | End              | Measurement [mBq/m <sup>3</sup> ] | Uncertainty [%] |
|----------------|------------------|------------------|-----------------------------------|-----------------|
| Ostrava        | 04.10.2017 15:00 | 05.10.2017 06:30 | <0.15                             |                 |
| Ostrava        | 05.10.2017 06:30 | 05.10.2017 14:30 | 0.48                              |                 |
| Ostrava        | 05.10.2017 14:30 | 06.10.2017 06:00 | <0.3                              |                 |
| Ostrava        | 06.10.2017 06:00 | 09.10.2017 06:00 | <0.03                             |                 |
| Plzen          | 26.09.2017 09:00 | 03.10.2017 09:00 | 0.62                              | 6               |
| Plzen          | 04.10.2017 08:00 | 10.10.2017 08:00 | <0.004                            |                 |
| Praha          | 29.09.2017 06:45 | 02.10.2017 16:40 | 13.1                              | 5.6             |
| Praha          | 02.10.2017 16:40 | 02.10.2017 20:25 | 1.38                              | 10.2            |
| Praha          | 02.10.2017 21:25 | 03.10.2017 08:10 | 0.94                              | 30              |
| Praha          | 03.10.2017 08:10 | 03.10.2017 15:00 | <0.04                             |                 |
| Praha          | 03.10.2017 15:05 | 04.10.2017 08:00 | <1                                |                 |
| Praha          | 04.10.2017 08:00 | 05.10.2017 08:05 | <0.01                             |                 |
| Praha          | 05.10.2017 08:05 | 06.10.2017 06:40 | <0.06                             |                 |
| Praha          | 06.10.2017 06:40 | 07.10.2017 10:30 | <0.08                             |                 |
| Praha          | 07.10.2017 10:40 | 10.10.2017 07:45 | <0.03                             |                 |
| Usti nad Labem | 26.09.2017 11:00 | 04.10.2017 09:00 | 4.23                              | 5.5             |
| Usti nad Labem | 04.10.2017 08:58 | 05.10.2017 10:28 | <0.25                             |                 |

### 3 Dataset WEEKS

| Station          | Start            | End              | Measurement [mBq/m <sup>3</sup> ] | Uncertainty [%] |
|------------------|------------------|------------------|-----------------------------------|-----------------|
| Brno             | 26.09.2017 09:00 | 03.10.2017 09:00 | 21.1                              | 5.5             |
| Brno             | 03.10.2017 16:00 | 10.10.2017 08:00 | 0.12                              | 12              |
| Ceske Budejovice | 26.09.2017 07:00 | 03.10.2017 07:00 | 1.9                               | 5.5             |
| Ceske Budejovice | 03.10.2017 07:10 | 10.10.2017 17:30 | <0.06                             |                 |
| Holesov          | 25.09.2017 07:20 | 02.10.2017 07:07 | 7.9                               | 10              |
| Holesov          | 02.10.2017 07:22 | 09.10.2017 07:07 | 9.1                               | 10              |
| Hradec Kralove   | 26.09.2017 06:46 | 03.10.2017 06:47 | 10.9                              | 7               |
| Hradec Kralove   | 03.10.2017 06:50 | 10.10.2017 06:30 | 0.267                             | 15              |
| Cheb             | 26.09.2017 11:50 | 03.10.2017 14:30 | <0.02                             |                 |
| Cheb             | 03.10.2017 11:50 | 10.10.2017 12:25 | <0.036                            |                 |
| Kamenna          | 25.09.2017 07:30 | 02.10.2017 07:30 | 3.74                              | 10              |
| Kamenna          | 02.10.2017 09:10 | 09.10.2017 09:10 | 0.425                             | 10              |
| Ostrava          | 25.09.2017 06:00 | 02.10.2017 06:00 | 3.82                              | 8               |
| Ostrava          | 02.10.2017 06:00 | 09.10.2017 06:00 | 10.74                             | 15              |
| Plzen            | 26.09.2017 09:00 | 03.10.2017 09:00 | 0.62                              | 6               |
| Plzen            | 03.10.2017 08:00 | 10.10.2017 08:00 | <0.004                            |                 |
| Praha            | 26.09.2017 08:00 | 03.10.2017 08:05 | 6.21                              | 10              |
| Praha            | 03.10.2017 08:05 | 10.10.2017 07:45 | <0.005                            |                 |
| Usti nad Labem   | 26.09.2017 11:00 | 04.10.2017 09:00 | 4.23                              | 5.5             |
| Usti nad Labem   | 04.10.2017 08:58 | 05.10.2017 10:28 | <0.25                             |                 |

### 4 Dataset FAST

| Station          | Start            | End              | Measurement [mBq/m <sup>3</sup> ] | Uncertainty [%] |
|------------------|------------------|------------------|-----------------------------------|-----------------|
| Brno             | 26.09.2017 09:00 | 03.10.2017 09:00 | 21.1                              | 5.5             |
| Brno             | 03.10.2017 16:00 | 04.10.2017 14:30 | 0.84                              | 12              |
| Brno             | 04.10.2017 08:00 | 10.10.2017 08:00 | <0.005                            |                 |
| Ceske Budejovice | 26.09.2017 07:00 | 03.10.2017 07:00 | 1.9                               | 5.5             |
| Ceske Budejovice | 03.10.2017 07:10 | 03.10.2017 17:30 | <0.1                              |                 |
| Ceske Budejovice | 03.10.2017 17:30 | 04.10.2017 15:30 | <0.1                              |                 |
| Ceske Budejovice | 04.10.2017 15:30 | 10.10.2017 07:30 | <0.05                             |                 |
| Holesov          | 25.09.2017 07:20 | 02.10.2017 07:07 | 7.9                               | 10              |
| Holesov          | 02.10.2017 07:22 | 05.10.2017 08:28 | 21.2                              | 10              |
| Holesov          | 05.10.2017 08:29 | 09.10.2017 07:07 | 0.018                             | 40              |
| Hradec Kralove   | 30.09.2017 00:00 | 03.10.2017 06:47 | 29.83                             | 6               |
| Hradec Kralove   | 03.10.2017 06:50 | 03.10.2017 13:50 | 4.19                              | 6               |
| Hradec Kralove   | 03.10.2017 13:54 | 04.10.2017 13:40 | <0.3                              |                 |
| Hradec Kralove   | 04.10.2017 13:40 | 05.10.2017 13:40 | <0.3                              |                 |
| Hradec Kralove   | 05.10.2017 13:40 | 10.10.2017 06:30 | <0.011                            |                 |
| Cheb             | 03.10.2017 11:50 | 04.10.2017 14:30 | <0.052                            |                 |
| Cheb             | 04.10.2017 14:30 | 10.10.2017 12:25 | <0.02                             |                 |
| Kamenna          | 25.09.2017 07:30 | 02.10.2017 07:30 | 3.74                              | 10              |
| Kamenna          | 02.10.2017 09:10 | 04.10.2017 14:12 | 1.31                              | 10              |
| Kamenna          | 04.10.2017 14:12 | 09.10.2017 09:10 | <0.02                             |                 |
| Ostrava          | 25.09.2017 06:00 | 02.10.2017 06:00 | 3.82                              | 8               |
| Ostrava          | 02.10.2017 06:00 | 03.10.2017 15:00 | 40                                | 10              |
| Ostrava          | 03.10.2017 15:00 | 04.10.2017 15:00 | 1.1                               | 10              |
| Ostrava          | 04.10.2017 15:00 | 05.10.2017 06:30 | <0.15                             |                 |
| Ostrava          | 05.10.2017 06:30 | 05.10.2017 14:30 | 0.48                              |                 |
| Ostrava          | 05.10.2017 14:30 | 06.10.2017 06:00 | <0.3                              |                 |
| Ostrava          | 06.10.2017 06:00 | 09.10.2017 06:00 | <0.03                             |                 |
| Plzen            | 26.09.2017 09:00 | 03.10.2017 09:00 | 0.62                              | 6               |
| Plzen            | 04.10.2017 08:00 | 10.10.2017 08:00 | <0.004                            |                 |
| Praha            | 29.09.2017 06:45 | 01.10.2017 04:07 | <1                                |                 |
| Praha            | 01.10.2017 04:00 | 01.10.2017 10:00 | 23.3                              | 15              |
| Praha            | 01.10.2017 10:00 | 01.10.2017 18:00 | 48.24                             | 15              |
| Praha            | 01.10.2017 18:00 | 02.10.2017 04:00 | 31.56                             | 15              |
| Praha            | 02.10.2017 04:00 | 02.10.2017 16:40 | 18.29                             | 15              |
| Praha            | 02.10.2017 16:40 | 02.10.2017 20:25 | 1.38                              | 10.2            |
| Praha            | 02.10.2017 21:25 | 03.10.2017 08:10 | 0.94                              | 30              |
| Praha            | 03.10.2017 08:10 | 03.10.2017 15:00 | <0.04                             |                 |
| Praha            | 03.10.2017 15:05 | 04.10.2017 08:00 | <1                                |                 |
| Praha            | 04.10.2017 08:00 | 05.10.2017 08:05 | <0.01                             |                 |
| Praha            | 05.10.2017 08:05 | 06.10.2017 06:40 | <0.06                             |                 |
| Praha            | 06.10.2017 06:40 | 07.10.2017 10:30 | <0.08                             |                 |
| Praha            | 07.10.2017 10:40 | 10.10.2017 07:45 | <0.03                             |                 |
| Praha            | 10.10.2017 07:50 | 13.10.2017 06:50 | <0.03                             |                 |
| Usti nad Labem   | 26.09.2017 11:00 | 04.10.2017 09:00 | 4.23                              | 5.5             |
| Usti nad Labem   | 04.10.2017 08:58 | 05.10.2017 10:28 | <0.25                             |                 |

## 5 Dataset CUT

| Station          | Start            | End              | Measurement [mBq/m <sup>3</sup> ] | Uncertainty [%] |
|------------------|------------------|------------------|-----------------------------------|-----------------|
| Brno             | 30.09.2017 00:00 | 03.10.2017 09:00 | 43.76                             | 5.5             |
| Brno             | 03.10.2017 16:00 | 04.10.2017 14:30 | 0.84                              | 12              |
| Brno             | 04.10.2017 08:00 | 10.10.2017 08:00 | <0.005                            |                 |
| Ceske Budejovice | 30.09.2017 00:00 | 03.10.2017 07:00 | 4.04                              | 5.5             |
| Ceske Budejovice | 03.10.2017 07:10 | 03.10.2017 17:30 | <0.1                              |                 |
| Ceske Budejovice | 03.10.2017 17:30 | 04.10.2017 15:30 | <0.1                              |                 |
| Ceske Budejovice | 04.10.2017 15:30 | 10.10.2017 07:30 | <0.05                             |                 |
| Holesov          | 30.09.2017 00:00 | 02.10.2017 07:07 | 24.05                             | 10              |
| Holesov          | 02.10.2017 07:22 | 05.10.2017 08:28 | 21.2                              | 10              |
| Holesov          | 05.10.2017 08:29 | 09.10.2017 07:07 | 0.018                             | 40              |
| Hradec Kralove   | 30.09.2017 00:00 | 03.10.2017 06:47 | 29.83                             | 6               |
| Hradec Kralove   | 03.10.2017 06:50 | 03.10.2017 13:50 | 4.19                              | 6               |
| Hradec Kralove   | 03.10.2017 13:54 | 04.10.2017 13:40 | <0.3                              |                 |
| Hradec Kralove   | 04.10.2017 13:40 | 05.10.2017 13:40 | <0.3                              |                 |
| Hradec Kralove   | 05.10.2017 13:40 | 10.10.2017 06:30 | <0.011                            |                 |
| Cheb             | 03.10.2017 11:50 | 04.10.2017 14:30 | <0.052                            |                 |
| Cheb             | 04.10.2017 14:30 | 10.10.2017 12:25 | <0.02                             |                 |
| Kamenna          | 01.10.2017 00:00 | 02.10.2017 07:30 | 19.95                             | 10              |
| Kamenna          | 02.10.2017 09:10 | 04.10.2017 14:12 | 1.31                              | 10              |
| Kamenna          | 04.10.2017 14:12 | 09.10.2017 09:10 | <0.02                             |                 |
| Ostrava          | 30.09.2017 00:00 | 02.10.2017 06:00 | 11.88                             | 8               |
| Ostrava          | 02.10.2017 06:00 | 03.10.2017 15:00 | 40                                | 10              |
| Ostrava          | 03.10.2017 15:00 | 04.10.2017 15:00 | 1.1                               | 10              |
| Ostrava          | 04.10.2017 15:00 | 05.10.2017 06:30 | <0.15                             |                 |
| Ostrava          | 05.10.2017 06:30 | 05.10.2017 14:30 | <0.48                             |                 |
| Ostrava          | 05.10.2017 14:30 | 06.10.2017 06:00 | <0.3                              |                 |
| Ostrava          | 06.10.2017 06:00 | 09.10.2017 06:00 | <0.03                             |                 |
| Plzen            | 01.10.2017 00:00 | 03.10.2017 09:00 | 1.83                              | 6               |
| Plzen            | 04.10.2017 08:00 | 10.10.2017 08:00 | <0.004                            |                 |
| Praha            | 29.09.2017 06:45 | 01.10.2017 04:07 | <1                                |                 |
| Praha            | 01.10.2017 04:00 | 01.10.2017 10:00 | 23.3                              | 15              |
| Praha            | 01.10.2017 10:00 | 01.10.2017 18:00 | 48.24                             | 15              |
| Praha            | 01.10.2017 18:00 | 02.10.2017 04:00 | 31.56                             | 15              |
| Praha            | 02.10.2017 04:00 | 02.10.2017 16:40 | 18.29                             | 15              |
| Praha            | 02.10.2017 16:40 | 02.10.2017 20:25 | 1.38                              | 10.2            |
| Praha            | 02.10.2017 21:25 | 03.10.2017 08:10 | 0.94                              | 30              |
| Praha            | 03.10.2017 08:10 | 03.10.2017 15:00 | <0.04                             |                 |
| Praha            | 03.10.2017 15:05 | 04.10.2017 08:00 | <1                                |                 |
| Praha            | 04.10.2017 08:00 | 05.10.2017 08:05 | <0.01                             |                 |
| Praha            | 05.10.2017 08:05 | 06.10.2017 06:40 | <0.06                             |                 |
| Praha            | 06.10.2017 06:40 | 07.10.2017 10:30 | <0.08                             |                 |
| Praha            | 07.10.2017 10:40 | 10.10.2017 07:45 | <0.03                             |                 |
| Praha            | 10.10.2017 07:50 | 13.10.2017 06:50 | <0.03                             |                 |

| Station        | Start            | End              | Measurement [mBq/m <sup>3</sup> ] | Uncertainty [%] |
|----------------|------------------|------------------|-----------------------------------|-----------------|
| Usti nad Labem | 01.10.2017 00:00 | 04.10.2017 09:00 | 9.92                              | 5.5             |
| Usti nad Labem | 04.10.2017 08:58 | 05.10.2017 10:28 | <0.25                             |                 |
